# Supplementary material for: A label-free ultrasensitive and selective strategy for Pb(ii) assay by a multifunctional DNA probe-mediated rolling-circle amplified synthesis of the G-quadruplexes
Source: Royal Society of Chemistry journal article supplement (doi:10.1039/c8ay00762d), 2018-01-01
Supplement: c8ay00762d1.pdf [file c8ay00762d1.pdf]

## 1 Electronic Supplementary Material

### 2 A label-free ultrasensitive and selective strategy for Pb(II) assay by a 3 multifunctional DNA probe-mediated rolling-circle amplified synthesis of G- 4 quadruplex

5  
6 Xiao-Feng Wang <sup>a,b</sup>, Yong-Sheng Wang <sup>a\*</sup>, Xi-Lin Xiao <sup>c</sup>, Wen-Bo Lan <sup>b,c</sup>, Bin Zhou <sup>a</sup>, Si-  
7 Han Chen <sup>a</sup>, Jin-Hua Xue <sup>a</sup>

8 <sup>a</sup> College of Public Health, University of South China, Hengyang 421001, PR China

9 <sup>b</sup> College of Public Health, Xiang Nan University, Chenzhou 423000, PR China

10 <sup>c</sup> College of Chemistry and Chemical Engineering, University of South China,

11 Hengyang 421001, PR China

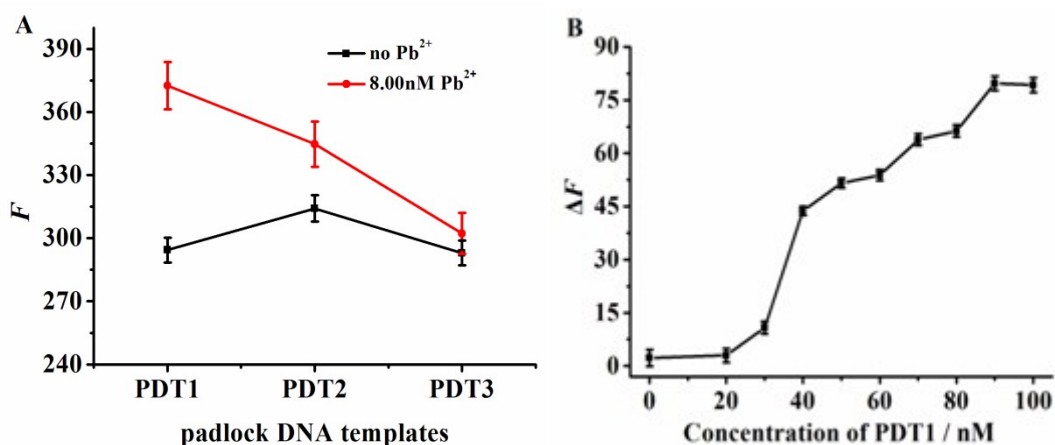

14  
15  
16 Fig. S1. Optimization of the padlock DNA template (A) and PDT1's concentration (B).

17 (A) and (B)  $c_{S-DNA} = 44.4$  nM,  $c_{E-DNA} = 35.6$  nM,  $c_{Pb(II)} = 8.00$  nM,  $c_{T4 DNA ligase} = 50$  U,  $c_{phi29} = 4.0$   
18 U,  $c_{dNTPs} = 20$  μM,  $c_{NMM} = 0.112$  μM. (A)  $c_{PDT1} = c_{PDT2} = c_{PDT3} = 50.0$  nM.

\* Corresponding author. Tel: +86 734 8281595; fax: +86 734 8281771.

E-mail address: [yongsheng.w@tom.com](mailto:yongsheng.w@tom.com) (Y.-S.Wang).

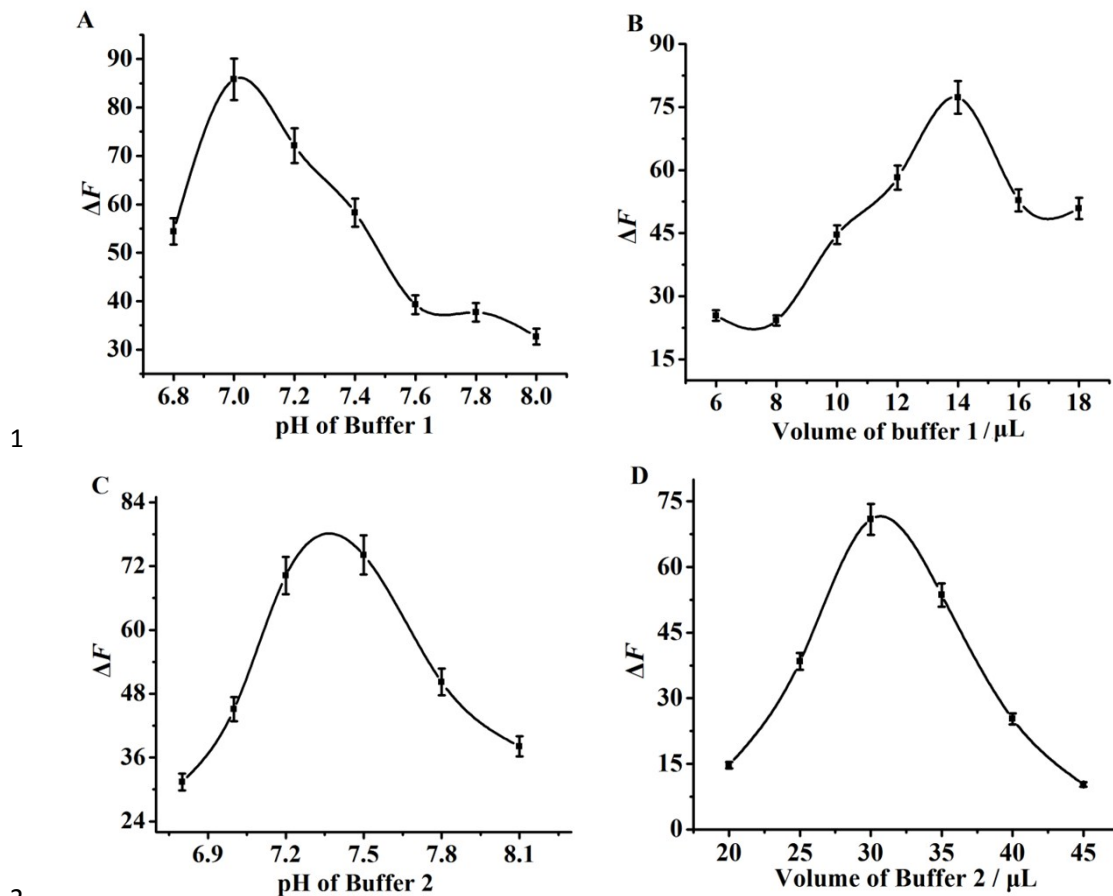

Fig. S2. Effect of the buffer on the sensing system.

8 (A), (B), (C) and (D)  $c_{E-DNA} = 53.3$  nM,  $c_{S-DNA} = 66.7$  nM,  $c_{Pb(II)} = 8.00$  nM,  $c_{PDT1} = 90.0$  nM,  $c_{NMM}$   
 9  $= 0.112$   $\mu$ M. (A) and (B)  $c_{T4$  DNA ligase = 50 U,  $c_{\phi 29} = 4.0$  U,  $c_{dNTPs} = 20$   $\mu$ M. (C) and (D)  
 10  $c_{T4$  DNA ligase = 35 U,  $c_{\phi 29} = 3.5$ U,  $c_{dNTPs} = 28$   $\mu$ M. (B) pH = 7.0. (D) pH = 7.5.

11 Table S1. Sequence information for padlock DNA templates (the italic part is complementary to  
 12 the E-DNA)

| Name | Sequence(5'- 3')                                                            | Base numbers | Pairing numbers |
|------|-----------------------------------------------------------------------------|--------------|-----------------|
| PDT1 | <i>TCG ACC GGT</i> AAA ACC CAA CCC GCC<br>CTA CCC AAA <i>AAC TCA CTA TT</i> | 44           | 18              |
| PDT2 | <i>TTT GAC CTA</i> AAA CCC AAC CCG CCC TAC<br>CCA AAA <i>ACT CAC TAT</i>    | 42           | 17              |
| PDT3 | <i>TTT CGA CCT</i> AAA ACC CAA CCC GCC CTA<br>CCC AAA <i>AAC TCA CTA</i>    | 42           | 16              |

13

1 Table S2. Comparison of this strategy with other methods for determination of Pb(II)

| Material/method                                       | Detection technique                      | Linear range     | Detection limit | Reference   |
|-------------------------------------------------------|------------------------------------------|------------------|-----------------|-------------|
| graphene and gold nanoparticles                       | Fluorescence                             | 50–1000 nM       | 10 nM           | 1           |
| T30695 and ZnPPIX                                     | Fluorescence                             | 20 – 1000 nM     | 20 nM           | 2           |
| polyguanine(G33) and terbium ions (Tb <sup>3+</sup> ) | Fluorescence                             | 3.0 – 50 nM      | 1.0 nM          | 4           |
| DNAzyme                                               | Fluorescence                             | 10 – 100 nM      | 10 nM           | 6           |
| DNAzyme                                               | Fluorescence                             | N/A <sup>a</sup> | 7.8 nM          | 8           |
| DNAzyme and gold nanoparticle                         | Colorimetric                             | N/A <sup>a</sup> | 500 nM          | 7           |
| DNAzyme                                               | Colorimetric                             | 5 –100 nM        | 5.0 nM          | 5           |
| DNAzyme                                               | Surface enhanced Raman Scattering        | N/A <sup>a</sup> | 20 nM           | 3           |
| DNAzyme                                               | strand displacement signal amplification | 200 pM-20 nM     | 200 pM          | 14          |
| G-quadruplex                                          | Fluorescence                             | 5 nM-1 μM        | 1 nM            | 30          |
| Graphene_DNAzyme                                      | Fluorescence                             | 1 nM-1 μM        | 300 pM          | 18          |
| MDP                                                   | Fluorescence                             | 0.32 – 16 nM     | 94.29 pM        | This method |

2 <sup>a</sup> Not available

3
